# Supplementary material for: Brain disconnections link structural connectivity with function and behaviour
Source: PubMed Central journal article supplement (PMC7547734; doi:10.1038/s41467-020-18920-9), 2020-10-09
Supplement: 41467_2020_18920_MOESM4_ESM.pdf [file 41467_2020_18920_MOESM4_ESM.pdf]

1 **Description of Additional Supplementary Files**

2

3 File Name: Supplementary Data 1

4 Description: Full list of the 46 components pattern of disconnection (components scores)

5

6 File Name: Supplementary Data 2

7 Description: Complete report of all task-related functional imaging correlations for each  
8 component
